# Supplementary material for: The effect of cartilage and bone density of mushroom-shaped, photooxidized, osteochondral transplants: an experimental study on graft performance in sheep using transplants originating from different species
Source: PubMed Central journal article supplement (PMC1343563; doi:10.1186/1471-2474-6-60), 2005-12-15
Supplement: 1471-2474-6-60-S1.pdf [file 1471-2474-6-60-S1.pdf]

**Tab.1 : Arrangement of groups**

| Material | Process     | Abreviation | Animals | Number of Implants |
|----------|-------------|-------------|---------|--------------------|
| Bovine   | new Process | BN          | 8       | 16                 |
|          | old Process | BO          | 4       | 8                  |
| Ovine    | new Process | ON          | 4       | 8                  |
|          | old Process | OO          | 4       | 8                  |
| Equine   | new Process | EN          | 4       | 8                  |
| Human    | new Process | HN          | 4       | 8                  |
|          | old Process | HO          | 4       | 8                  |
| Total    |             |             | 32      | 64                 |
