# Supplementary material for: The effect of cartilage and bone density of mushroom-shaped, photooxidized, osteochondral transplants: an experimental study on graft performance in sheep using transplants originating from different species
Source: PubMed Central journal article supplement (PMC1343563; doi:10.1186/1471-2474-6-60), 2005-12-15
Supplement: 1471-2474-6-60-S2.pdf [file 1471-2474-6-60-S2.pdf]

**Tab.2: Evaluation of synovial membranes**

| Score | Shape of synoviocytes | Proliferation of synovial layer | Neutrophiles | Eosinophiles | Lymphocytes | Plasmacells | Macrophages | Proliferation of vessels | Fibrin-Exsudation | Fibrotic metaplasia |
|-------|-----------------------|---------------------------------|--------------|--------------|-------------|-------------|-------------|--------------------------|-------------------|---------------------|
| 0     | normal                | 1-2 layers                      | none         | none         | none        | none        | none        | none                     | none              | none                |
| 1     | slightly cubical      | 3-4 layers                      | few          | few          | few         | few         | few         | mild                     | mild              | mild                |
| 2     | cubical               | 4-6 layers                      | moderate     | moderate     | moderate    | moderate    | moderate    | moderate                 | moderate          | moderate            |
| 3     | prismatic             | > 6 layers                      | everywhere   | severe       | severe      | severe      | everywhere  | severe                   | excessive         | severe              |
