# Supplementary material for: The effect of cartilage and bone density of mushroom-shaped, photooxidized, osteochondral transplants: an experimental study on graft performance in sheep using transplants originating from different species
Source: PubMed Central journal article supplement (PMC1343563; doi:10.1186/1471-2474-6-60), 2005-12-15
Supplement: 1471-2474-6-60-S3.pdf [file 1471-2474-6-60-S3.pdf]

**Tab.3 : Evaluation cartilage layer of osteochondral mushroom grafts and host matrix**

| <b>Rating</b>                                       | <b>Score Typ</b> | <b>0</b>   | <b>1</b>                       | <b>2</b>                   | <b>3</b>                       |
|-----------------------------------------------------|------------------|------------|--------------------------------|----------------------------|--------------------------------|
| Cartilage surface (graft)                           | a                | smooth     | even, but small rough areas    | multiple rough areas       | extremely rough                |
| Pannus at surface (graft)                           | a                | none       | layer formation at small areas | continuous thin layer      | continuous thick layer         |
| Cartilage metachromasie (graft)                     | b                | everywhere | mostly seen                    | small areas only           | none                           |
| Collagen breakdown (graft)                          | a                | none       | 1 small area                   | multiple small areas       | visible everywhere             |
| Fibrillation of matrix (graft)                      | a                | none       | 1 small area                   | multiple small areas       | visible everywhere             |
| Dislocation of graft                                | a                | none       | 1 side only (not excessive)    | both sides (not excessive) | 1 or both sides (severely)     |
| Cleft formation in matrix                           | a                | none       | 1 small cleft                  | 1 big or 2 small clefts    | > 3 clefts                     |
| Cartilage viability (graft)                         | b                | everywhere | just top and bottom part       | top or bottom part only    | none                           |
| Cartilage viability (host)                          | b                | everywhere | just top and bottom part       | top or bottom part only    | none                           |
| Chondrocyte proliferation (graft)                   | b                | everywhere | mostly seen                    | small areas only           | none                           |
| Chondrocyte proliferation (host)                    | b                | everywhere | mostly seen                    | small areas only           | none                           |
| Cluster formation (graft)                           | a                | none       | 1 cluster                      | 2-4 clusters               | > 5 clusters                   |
| Cluster formation (host)                            | a                | none       | 1 cluster                      | 2-4 clusters               | > 5 clusters                   |
| Graft-Host-Junction (fusion)                        | b                | fusion     | mostly fused                   | fusion at small areas only | none                           |
| Osteoclasts (graft)                                 | a                | none       | 1 per powerfield               | 2-4 per powerfield         | > 5 osteoclasts per powerfield |
| Osteoclasts (bone)                                  | a                | none       | 1 per powerfield               | 2-4 per powerfield         | > 5 osteoclasts per powerfield |
| Remodeling tide line/calcified cartilage            | a                | none       | 1/3 of the length              | 2/3 of the length          | everywhere                     |
| Cutting cones through tide line/calcified cartilage | a                | none       | 1 cone                         | 2-4 cones                  | > 5 cones                      |
| Multinuclear cells below calcified layer            | a                | none       | 1 small area                   | multiple small areas       | visible everywhere             |
