# Supplementary material for: The effect of cartilage and bone density of mushroom-shaped, photooxidized, osteochondral transplants: an experimental study on graft performance in sheep using transplants originating from different species
Source: PubMed Central journal article supplement (PMC1343563; doi:10.1186/1471-2474-6-60), 2005-12-15
Supplement: 1471-2474-6-60-S4.pdf [file 1471-2474-6-60-S4.pdf]

**Tab.4 : Observations after sample harvesting**

| Material | Number of condyles | Still blue color |     | Partially overgrown |     | Sunk in |     |
|----------|--------------------|------------------|-----|---------------------|-----|---------|-----|
|          |                    | lat              | med | lat                 | med | lat     | med |
| BN       | 16                 | 8                | 6   | 4                   | 8   | 6       | 12  |
| BO       | 8                  | 4                | 4   | 0                   | 2   | 2       | 3   |
| ON       | 8                  | 3                | 3   | 1                   | 2   | 1       | 3   |
| OO       | 8                  | 2                | 2   | 2                   | 4   | 1       | 3   |
| EN       | 8                  | 4                | 4   | 1                   | 1   | 1       | 0   |
| HN       | 8                  | 4                | 4   | 0                   | 1   | 1       | 1   |
| HO       | 8                  | 2                | 0   | 3                   | 4   | 2       | 4   |
| Total    | 64                 | 27               | 23  | 11                  | 22  | 14      | 26  |
