# Supplementary material for: The effect of cartilage and bone density of mushroom-shaped, photooxidized, osteochondral transplants: an experimental study on graft performance in sheep using transplants originating from different species
Source: PubMed Central journal article supplement (PMC1343563; doi:10.1186/1471-2474-6-60), 2005-12-15
Supplement: 1471-2474-6-60-S5.pdf [file 1471-2474-6-60-S5.pdf]

**Tab.5 : Number of cysts radiographs**

| Material | Number of condyles | Cysts |     | Total      |
|----------|--------------------|-------|-----|------------|
|          |                    | lat   | med |            |
| BN       | 16                 | 4     | 6   | 10 (62.5%) |
| BO       | 8                  | 2     | 2   | 4 (50%)    |
| ON       | 8                  | 3     | 4   | 7 (25%)    |
| OO       | 8                  | 1     | 1   | 2 (25%)    |
| EN       | 8                  | 1     | 1   | 2 (25%)    |
| HN       | 8                  | 2     | 0   | 2 (25%)    |
| HO       | 8                  | 4     | 4   | 8 (100%)   |
| Total    | 64                 | 17    | 18  | 28         |
