# Supplementary material for: The effect of cartilage and bone density of mushroom-shaped, photooxidized, osteochondral transplants: an experimental study on graft performance in sheep using transplants originating from different species
Source: PubMed Central journal article supplement (PMC1343563; doi:10.1186/1471-2474-6-60), 2005-12-15
Supplement: 1471-2474-6-60-S6.pdf [file 1471-2474-6-60-S6.pdf]

**Tab.6: Overview of statistical results (synovial membranes)**

| Synovial Membran Score     | Score | BN (n=32)  | BO (n=16)  | EN (n=16) | HN (n=16)   | HO (n=16)  | ON (n=16)  | OO (n=16)  | Overall Interaction |
|----------------------------|-------|------------|------------|-----------|-------------|------------|------------|------------|---------------------|
| Shape Synoviocytes         | a     | 0.31 ± 0.6 | 0          | 0         | 0.75 ± 0.7  | 0.88 ± 0.3 | 0.63 ± 0.5 | 0.38 ± 0.5 | P<.0001             |
| Proliferation Synoviocytes | a     | 0.19 ± 0.5 | 0          | 0         | 0.38 ± 0.5  | 0.13 ± 0.3 | 0.13 ± 0.3 | 0          | P=.0354             |
| Neutrophil Granulocytes    | a     | 0          | 0          | 0         | 0           | 0          | 0          | 0          |                     |
| Eosinophil Granulocytes    | a     | 0          | 0          | 0         | 0           | 0          | 0.5        | 0          | P=.0005             |
| Lymphocytes                | a     | 0.19 ± 0.4 | 0          | 0         | 1.75 ± 1    | 1 ± 0.73   | 0.38 ± 0.5 | 0          | P<.0001             |
| Plasmacells                | a     | 0.12 ± 0.3 | 0          | 0         | 0.88 ± 0.62 | 0.5 ± 0.5  | 0.5 ± 0.5  | 0          | P<.0001             |
| Macrophages                | a     | 0.12 ± 0.3 | 0          | 0         | 0.75 ± 0.5  | 0.25 ± 0.5 | 0.13 ± 0.3 | 0          | P<.0001             |
| Bloodvessels               | a     | 0          | 0          | 0         | 0           | 0          | 0          | 0          |                     |
| Fibrinous Exsudate         | a     | 0.19 ± 0.4 | 0.31 ± 0.4 | 0         | 0.375 ± 0.5 | 0.25 ± 0.4 | 0.25 ± 0.4 | 0          | P<.0393             |
| Fibrotic Metaplasia        | a     | 0          | 0          | 0         | 0           | 0          | 0          | 0          |                     |

a. for degenerative aspects: 0=none, 1=mild, 2=moderate, 3=severe

b. for regenerativ aspects: 0=good, 1=medium, 2=few, 3=none

Low scores represent good results, while high scores mean less good results
