# Supplementary material for: The effect of cartilage and bone density of mushroom-shaped, photooxidized, osteochondral transplants: an experimental study on graft performance in sheep using transplants originating from different species
Source: PubMed Central journal article supplement (PMC1343563; doi:10.1186/1471-2474-6-60), 2005-12-15
Supplement: 1471-2474-6-60-S7.pdf [file 1471-2474-6-60-S7.pdf]

**Tab.7: Overview of statistical results (cartilage and subchondral bone)**

| Cartilage Score                                     | Score | BN (n=32)  | BO (n=16)  | EN (n=16)  | HN (n=16)  | HO (n=16)  | ON (n=16)   | OO (n=16)   | Overall Interaction | Individual interaction                                                                                                                                                                                         |
|-----------------------------------------------------|-------|------------|------------|------------|------------|------------|-------------|-------------|---------------------|----------------------------------------------------------------------------------------------------------------------------------------------------------------------------------------------------------------|
| Cartilage Surface                                   | a     | 1.71 ± 0.8 | 1.26 ± 0.6 | 0.44 ± 0.5 | 1.78 ± 1.3 | 1.75 ± 1.5 | 1.58 ± 1    | 1.2 ± 1.4   | p=.0017             | bn,en: P<.0001;bo,en: P=.0191; en,hn: P=.0002; en,hn: P=.0167; en,on: P=.0024; en,oo: P=.0301                                                                                                                  |
| Pannus surface                                      | a     | 1.77 ± 1.2 | 1.32 ± 1   | 0.6 ± 1    | 0.37 ± 0.7 | 2.43 ± 0.9 | 0.58 ± 1    | 1.25 ± 1.3  | p<.0001             | bn,en ; P<.0001; bo,en: P=.0007; en,ho: P<.0001; en,oo: P=.0012; hn,ho: P<.0001                                                                                                                                |
| Cartilage metachromasie                             | b     | 1.57 ± 1.1 | 1.12 ± 0.8 | 1.38 ± 0.5 | 1.43 ± 0.7 | 1.3 ± 1.2  | 2.17 ± 0.7  | 1.67 ± 0.7  | p=.0935             | bn,on: P=.0485; bo,on: P=.0025; en,on: P=.0203; hn,on: P=.0353; ho,on: P=.0340                                                                                                                                 |
| Collagen breakdown                                  | a     | 1.47 ± 1.1 | 0.56 ± 0.6 | 1.25 ± 0.6 | 0.33 ± 0.5 | 0.5 ± 0.9  | 0.83 ± 0.84 | 0.47 ± 0.6  | p<.0001             | bn,bo: P=.0004; bn,hn: P<.0001; bn,ho: P=.0030; bn,ho: P=.0223; bn,oo: P=.0001; bo,en: P=.0167; en,hn: P=.0019; en,ho: P=.0326; hn,oo: P=.0075                                                                 |
| Fibrillation of matrix                              | a     | 0.63 ± 0.8 | 0.5 ± 0.5  | 0.25 ± 0.5 | 0.46 ± 0.7 | 1 ± 0      | 0.83 ± 1.2  | 0.2 ± 0.4   | p=.0976             | en,on: P=.0273; ho,oo: P=.0396; on,oo: P=.0184                                                                                                                                                                 |
| Dislocation of graft                                | a     | 2.18 ± 0.9 | 1.63 ± 1.0 | 0.36 ± 0.9 | 0.5 ± 0.9  | 2.57 ± 0.8 | 1.38 ± 1.3  | 1 ± 1.3     | P<.0001             |                                                                                                                                                                                                                |
| Cleft formation in matrix                           | a     | 0.73 ± 0.9 | 0.56 ± 0.9 | 0.5 ± 0.73 | 1.57 ± 1.5 | 2.28 ± 1.1 | 0.67 ± 1.15 | 0.47 ± 0.7  | P=.0003             | bn,hn: P=.0110; bn,ho: P=.0004; bo,hn: P=.0002; en,hn: P=.0042,en,ho: P=.0001; hn,on: P=.0235; hn,oo: P=.0009; ho,oo: P=.0001                                                                                  |
| Cartilage viability (graft)                         | b     | 1.57 ± 1.1 | 1.25 ± 0.8 | 1.38 ± 0.5 | 1.43 ± 0.8 | 1.63 ± 1.2 | 2 ± 0.9     | 1.56 ± 0.8  | P=.3360             | bo,on: P=.0150                                                                                                                                                                                                 |
| Cartilage viability (host)                          | b     | 0.72 ± 0.6 | 0.75 ± 0.5 | 0.25 ± 0.5 | 0.6 ± 0.6  | 0.62 ± 0.7 | 0.67 ± 0.5  | 0.5 ± 0.7   | P=.2091             | bn,en: P=.0180; bo,en: P=.0183                                                                                                                                                                                 |
| Chondrozytenprolif.(graft)                          | b     | 2.37 ± 1   | 1.75 ± 0.8 | 1.88 ± 0.7 | 2.2 ± 0.6  | 2.67 ± 0.5 | 1.75 ± 1.1  | 1.67 ± 0.9  | P=.0150             | bn,bo: P=.0208; bn,on: P=.0358; bn,oo: P=.0104; bo,ho: P=.0109; en,ho: P=.0273; ho,on: P=.0160; ho,oo: P0.0062                                                                                                 |
| Chondrozytenprolif. (host)                          | b     | 0.91 ± 0.6 | 0.81 ± 0.4 | 0.5 ± 0.5  | 0.6 ± 0.5  | 0.57 ± 0.8 | 0.75 ± 0.6  | 0.88 ± 1    | P=.3527             | bn,en: P=.0496                                                                                                                                                                                                 |
| Cluster formation (graft)                           | a     | 0.3 ± 0.2  | 0          | 0          | 0          | 0          | 0           | 0           | P=.8571             |                                                                                                                                                                                                                |
| Cluster formation (host)                            | a     | 2 ± 0.8    | 1.5 ± 0.7  | 0.75 ± 0.7 | 1.3 ± 1.1  | 2.18 ± 0.8 | 1.58 ± 0.9  | 1.63 ± 0.8  | P<.0001             | bn,en: <.0001; bn,hn: P=.0090; bo,hn: P=.0134; bo,ho: P=.0231; en,ho: P<.0001; en,on: P=.0110; en,oo: P=.0041; hn,ho: P=.0041                                                                                  |
| Fusion                                              | b     | 2.8 ± 0.5  | 2.56 ± 1   | 2.19 ± 0.5 | 2.87 ± 0.4 | 2 ± 1.5    | 2.08 ± 0.9  | 2.12 ± 1.1  | P=.0065             | bn,en: P=.0143; bn,ho: P=.0264; bn,on: P=.0095; bn,oo: P=.0071; en,hn: P=.0191; hn,ho: P=.0259; hn,on: P=.0123; hn,oo: P=.0107                                                                                 |
| Osteoclast host                                     | a     | 0.56 ± 0.7 | 0.38 ± 0.5 | 0.25 ± 0.5 | 0.50 ± 0.8 | 0.25 ± 0.5 | 0.63 ± 0.5  | 0.38 ± 0.72 | P=.45               |                                                                                                                                                                                                                |
| Osteoclasts graft                                   | a     | 0.19 ± 0.4 | 0.38 ± 0.7 | 0.25 ± 0.5 | 0.13 ± 0.3 | 0.38 ± 0.5 | 0.13 ± 0.3  | 0           | P=.1458             | bo,on: P=.0162; ho,oo: P=.0162                                                                                                                                                                                 |
| Remodeling tide line/calcified cartilage            | a     | 2.58 ± 0.9 | 1.5 ± 1.3  | 0.63 ± 1.1 | 0.25 ± 0.5 | 1 ± 1.0    | 1.57 ± 1.1  | 2 ± 0.9     | P<.0001             | bn,bo: P=.0009; bn,en: P<.0001; bn,hn: P<.0001; bn,ho: P<.0001; bn,on: P=.0029; bo,en: P=.0136; bo,hn: P=.0005; en,on: P=.0100; en,oo: P=.0001; hn,ho: P=.0337; hn,on: P=.0004; hn,oo: P<.0001; ho,oo: P=.0050 |
| Cutting cones through tide line/calcified cartilage | a     | 1 ± 1.3    | 0.5 ± 0.5  | 0.75 ± 1.1 | 1.13 ± 1.1 | 0.71 ± 0.7 | 1.2 ± 0.4   | 0.83 ± 0.7  | P=.4850             |                                                                                                                                                                                                                |
| multinuclear cells below calcified layer            | a     | 1.5 ± 1.2  | 0.33 ± 0.8 | 0.38 ± 1.0 | 0          | 0.29 ± 0.7 | 0.4 ± 0.8   | 0.3 ± 0.8   | P=.0068             | bn,bo: P=.0021; bn,en: P=.0018; bn,hn: P<.0010; bn,ho: P=.0010; bn,on: P=.0050; bn,oo: P=.0021                                                                                                                 |

a. for degenerative aspects: 0=none, 1=mild, 2=moderate, 3=severe

b. for regenerativ aspects: 0=good, 1=medium, 2=few, 3=none

Low scores presents good results, while high scores mean less good results

best group  
 second best group  
 worst group
