# Supplementary material for: The effect of cartilage and bone density of mushroom-shaped, photooxidized, osteochondral transplants: an experimental study on graft performance in sheep using transplants originating from different species
Source: PubMed Central journal article supplement (PMC1343563; doi:10.1186/1471-2474-6-60), 2005-12-15
Supplement: 1471-2474-6-60-S8.pdf [file 1471-2474-6-60-S8.pdf]

Tab.8 : Overview of statistical results (histomorphometry)

| Material              | BN          | BO           | EN           | HN          | HO           | ON          | OO          | P- Value overall | P-Value individual                                                                                                               |
|-----------------------|-------------|--------------|--------------|-------------|--------------|-------------|-------------|------------------|----------------------------------------------------------------------------------------------------------------------------------|
| <b>Fibrous tissue</b> | 37.06 ± 8.4 | 35.87 ± 10.6 | 29.87 ± 5.6  | 31.97 ± 7.8 | 48.66 ± 11.4 | 33.86 ± 8.8 | 37.94 ± 9.1 | P=.0043          | bn,ho: P=.0041;<br>bo,ho: P=.0059;<br>en,ho: P=.0002;<br>hn,ho: P=.0004;<br>ho,on: P=.0017;<br>ho,oo: P=.0243                    |
| <b>Bone</b>           | 44.02 ± 7.1 | 43.41 ± 9.5  | 51.31 ± 11.1 | 44.85 ± 8.6 | 30.82 ± 4.6  | 45.53 ± 8.0 | 49.20 ± 3.9 | P=.0002          | bn,en: P=.0429;<br>bn,ho: P=.0002;<br>bo,ho: P=.0020;<br>en,ho: P<.0001;<br>hn,ho: P=.0007;<br>ho,on: P=.0004;<br>ho,oo: P<.0001 |
| <b>Cartilage</b>      | 7.90 ± 3.9  | 11.0 ± 3.42  | 9.66 ± 3.9   | 13.86 ± 3.5 | 11.61 ± 5.7  | 7.13 ± 4.8  | 6.00 ± 3.3  | P=.0043          | bn,hn: P=.0017;<br>bn,ho: P=.0446;<br>bo,oo: P=.0241;<br>hn,on: P=.0021;<br>hn,oo: P=.0006;<br>ho,on: P=.0363;<br>ho,oo: P=.0019 |
